# Supplementary material for: Differential Responses of Soil Microbial N-Cycling Functional Genes to 35 yr Applications of Chemical Fertilizer and Organic Manure in Wheat Field Soil on Loess Plateau
Source: MDPI journal article supplement (doi:10.3390/agronomy13061516), 2023-05-31
Supplement: s1 [file s1]

## Supplementary Material

### Differential responses of soil microbial N-cycling functional genes to 35-yr applications of chemical fertilizer and organic manure in wheat field soil on Loess Plateau

Yinyan Liang<sup>1</sup>, Caidi Yang<sup>1</sup>, Upendra M. Sainju<sup>2</sup>, Nannan Zhang<sup>1</sup>, Fazhu Zhao<sup>1</sup>, Weizhen Wang<sup>3</sup> and Jun Wang<sup>1, 4, \*</sup>

<sup>1</sup> Shaanxi Key Laboratory of Earth Surface System and Environmental Carrying Capacity, College of Urban and Environmental Science, Northwest University, Xi'an, 710127, China

<sup>2</sup> USDA-ARS, Northern Plains Agricultural Research Laboratory, 1500 North Central Avenue, Sidney, MT 59270, USA

<sup>3</sup> College of Life Sciences, Northwest University, Xi'an, 710069, China

<sup>4</sup> State Key Laboratory of Soil Erosion and Dryland Farming on the Loess Plateau, Institute of Soil and Water Conservation, Chinese Academy of Sciences and Ministry of Water Resources, Yangling, 712100, China

\* Correspondence: wangj@nwu.edu.cn

### Supplementary Tables

**Table S1.** Basic information of metagenomic sequencing.

| Sample | Raw reads | Clean reads | Percent in raw<br>reads (%) | Contigs | N50(bp) | N90(bp) | ORFs   |
|--------|-----------|-------------|-----------------------------|---------|---------|---------|--------|
| CK1    | 74518078  | 73347560    | 98.4                        | 588651  | 557     | 337     | 713765 |

|     |          |          |      |        |     |     |         |
|-----|----------|----------|------|--------|-----|-----|---------|
| CK2 | 82203440 | 80766386 | 98.3 | 641506 | 553 | 337 | 777364  |
| CK3 | 77792976 | 76523224 | 98.4 | 646222 | 518 | 334 | 767785  |
| NF1 | 97068118 | 95593222 | 98.5 | 853523 | 562 | 337 | 1044869 |
| NF2 | 71678650 | 70343720 | 98.1 | 513519 | 534 | 334 | 615995  |
| NF3 | 76053118 | 74846742 | 98.4 | 556979 | 550 | 336 | 675738  |
| OM1 | 91842924 | 90429626 | 98.5 | 654369 | 552 | 335 | 794524  |
| OM2 | 94752876 | 93240514 | 98.4 | 724029 | 566 | 336 | 889548  |
| OM3 | 85329576 | 83976936 | 98.4 | 592182 | 547 | 335 | 717171  |
| NM1 | 87456992 | 85732274 | 98.0 | 616635 | 539 | 334 | 744038  |
| NM2 | 82327608 | 80961138 | 98.3 | 575981 | 543 | 335 | 697634  |
| NM3 | 75858500 | 74620824 | 98.4 | 499066 | 556 | 336 | 608163  |

**Table S2.** The information of microbial functional genes involved in N cycling processes identified in this study referring to KEGG database.

| Classification  | KO<br>number | Details for gene function                                 | Gene name             |
|-----------------|--------------|-----------------------------------------------------------|-----------------------|
| Nitrification   | K10944       | methane/ammonia monooxygenase subunit A                   | <i>pmoA-amoA</i>      |
|                 | K10945       | methane/ammonia monooxygenase subunit B                   | <i>pmoB-amoB</i>      |
|                 | K10946       | methane/ammonia monooxygenase subunit C                   | <i>pmoC-amoC</i>      |
|                 | K10535       | hydroxylamine dehydrogenase                               | <i>hao</i>            |
| Denitrification | K00370       | nitrate reductase / nitrite oxidoreductase, alpha subunit | <i>narG,narX,nxrA</i> |

|                   |        |                                                           |                       |
|-------------------|--------|-----------------------------------------------------------|-----------------------|
|                   | K00371 | nitrate reductase / nitrite oxidoreductase, beta subunit  | <i>narH,narY,nxrB</i> |
|                   | K00374 | nitrate reductase gamma subunit                           | <i>narI,narV</i>      |
|                   | K00368 | nitrite reductase (NO-forming)                            | <i>nirK</i>           |
|                   | K15864 | nitrite reductase (NO-forming) / hydroxylamine reductase  | <i>nirS</i>           |
|                   | K04561 | nitric oxide reductase subunit B                          | <i>norB</i>           |
|                   | K02305 | nitric oxide reductase subunit C                          | <i>norC</i>           |
|                   | K00376 | nitrous-oxide reductase                                   | <i>nosZ</i>           |
| Dissimilatory     | K02567 | nitrate reductase (cytochrome)                            | <i>napA</i>           |
| nitrate reduction | K02568 | nitrate reductase (cytochrome), electron transfer subunit | <i>napB</i>           |
|                   | K00362 | nitrite reductase (NADH) large subunit                    | <i>nirB</i>           |
|                   | K00363 | nitrite reductase (NADH) small subunit                    | <i>nirD</i>           |
|                   | K03385 | nitrite reductase (cytochrome c-552)                      | <i>nrfA</i>           |
|                   | K15876 | cytochrome c nitrite reductase small subunit              | <i>nrfH</i>           |
| Assimilatory      | K00367 | ferredoxin-nitrate reductase                              | <i>narB</i>           |
| nitrate reduction | K00372 | assimilatory nitrate reductase catalytic subunit          | <i>nasA</i>           |
|                   | K00360 | assimilatory nitrate reductase electron transfer subunit  | <i>nasB</i>           |
|                   | K00366 | ferredoxin-nitrite reductase                              | <i>nirA</i>           |
| Organic nitrogen  | K01428 | urease subunit alpha                                      | <i>ureC</i>           |
| metabolism        | K00034 | glucose 1-dehydrogenase                                   | <i>gdh</i>            |

**Table S3.** Effects of organic manure and chemical N fertilization on soil properties.

| Index | Unit                | CK              | NF              | OM               | NM               | F     | <i>p</i>         |
|-------|---------------------|-----------------|-----------------|------------------|------------------|-------|------------------|
| pH    | -                   | 8.27 ± 0.06 a   | 8.30 ± 0.04 a   | 8.32 ± 0.05 a    | 8.28 ± 0.04 a    | 0.17  | 0.914            |
| BD    | g·cm <sup>-3</sup>  | 1.19 ± 0.02 a   | 1.22 ± 0.04 a   | 1.13 ± 0.02 a    | 1.12 ± 0.05 a    | 1.89  | 0.210            |
| SWC   | %                   | 18.84 ± 0.23 b  | 18.68 ± 0.28 b  | 21.36 ± 0.76 a   | 20.95 ± 0.22 a   | 10.15 | <b>0.004</b>     |
| C:N   | -                   | 7.13 ± 0.33 b   | 8.40 ± 0.39 a   | 8.19 ± 0.23 a    | 8.26 ± 0.19 a    | 4.04  | 0.051            |
| SOC   | g·kg <sup>-1</sup>  | 7.20 ± 0.39 b   | 7.62 ± 0.11 b   | 10.62 ± 0.31 a   | 11.38 ± 0.40 a   | 41.72 | <b>&lt;0.001</b> |
| POC   | g·kg <sup>-1</sup>  | 2.09 ± 0.20 a   | 2.54 ± 0.17 a   | 3.18 ± 0.59 a    | 2.64 ± 0.27 a    | 1.67  | 0.250            |
| PCM   | mg·kg <sup>-1</sup> | 183.60 ± 2.08 b | 216.00 ± 4.16 b | 309.60 ± 12.47 a | 320.40 ± 18.71 a | 35.05 | <b>&lt;0.001</b> |
| MBC   | mg·kg <sup>-1</sup> | 223.41 ± 5.43 b | 246.34 ± 6.45 b | 354.63 ± 17.81 a | 327.32 ± 17.16 a | 23.23 | <b>&lt;0.001</b> |

Treatments were CK, control; NF, chemical N fertilization; OM, organic manure application; and NM, combination of chemical N fertilizer and organic manure application. Soil properties were pH; BD, bulk density; SWC, soil water content; C: N, the ratio of soil organic C to total N; SOC, soil organic C; POC, particulate organic C; PCM, potential C mineralization; and MBC, microbial biomass C. Values are means ± standard errors (n = 3). Different lowercase letters in a row indicate significant difference (*p* < 0.05) among treatments.

**Table S4.** The abundances of genes involved in soil N cycling under different fertilization treatments.

| Classification | Gene        | CK             | NF             | OM             | NM             | F     | <i>p</i>     |
|----------------|-------------|----------------|----------------|----------------|----------------|-------|--------------|
| Nitrification  | <i>amoA</i> | 4.30 ± 0.44 ab | 5.23 ± 1.19 ab | 3.27 ± 0.79 b  | 6.51 ± 1.09 a  | 2.22  | 0.163        |
|                | <i>amoB</i> | 17.12 ± 0.93 a | 18.78 ± 1.59 a | 18.13 ± 1.30 a | 18.61 ± 1.28 a | 0.33  | 0.804        |
|                | <i>amoC</i> | 5.75 ± 0.42 b  | 9.17 ± 0.42 a  | 9.99 ± 0.14 a  | 9.51 ± 1.07 a  | 9.732 | <b>0.005</b> |
|                | <i>hao</i>  | 0.49 ± 0.07 b  | 3.14 ± 1.02 a  | 0.55 ± 0.29 ab | 3.16 ± 1.23 a  | 3.505 | 0.069        |

|                   |             |                  |                  |                 |                  |        |                  |
|-------------------|-------------|------------------|------------------|-----------------|------------------|--------|------------------|
| Denitrification   | <i>narG</i> | 60.22 ± 2.04 b   | 61.52 ± 3.22 b   | 67.79 ± 1.93 b  | 78.44 ± 3.89 a   | 8.3    | <b>0.008</b>     |
|                   | <i>narH</i> | 26.71 ± 2.31 c   | 30.79 ± 2.01 bc  | 35.41 ± 0.50 ab | 39.29 ± 3.92 a   | 4.798  | <b>0.034</b>     |
|                   | <i>narI</i> | 4.32 ± 0.71 b    | 4.54 ± 0.13 b    | 5.37 ± 1.01 b   | 9.65 ± 0.64 a    | 12.727 | <b>0.002</b>     |
|                   | <i>nirK</i> | 83.31 ± 3.59 b   | 84.69 ± 1.94 b   | 95.82 ± 5.08 a  | 96.45 ± 0.99 a   | 4.555  | <b>0.038</b>     |
|                   | <i>nirS</i> | 5.80 ± 0.47 a    | 6.00 ± 1.18 a    | 5.35 ± 0.73 a   | 6.23 ± 1.25 a    | 0.151  | 0.926            |
|                   | <i>norB</i> | 55.63 ± 3.55 a   | 50.65 ± 2.60 a   | 53.87 ± 1.87 a  | 54.39 ± 4.34 a   | 0.433  | 0.735            |
|                   | <i>norC</i> | 3.40 ± 0.65 a    | 2.70 ± 0.06 a    | 3.21 ± 0.18 a   | 3.98 ± 0.58 a    | 1.392  | 0.314            |
|                   | <i>nosZ</i> | 26.95 ± 1.73 c   | 28.30 ± 1.10 bc  | 30.88 ± 0.68 b  | 40.19 ± 0.60 a   | 28.277 | <b>&lt;0.001</b> |
| Dissimilatory     | <i>napA</i> | 32.36 ± 2.59 b   | 32.50 ± 3.02 b   | 38.45 ± 2.06 ab | 43.77 ± 3.01 a   | 4.105  | <b>0.049</b>     |
| nitrate reduction | <i>napB</i> | 4.34 ± 0.62 b    | 3.69 ± 0.51 b    | 8.06 ± 1.45 a   | 8.95 ± 0.74 a    | 8.383  | <b>0.007</b>     |
|                   | <i>nirB</i> | 157.42 ± 1.27 ab | 144.38 ± 4.68 b  | 164.13 ± 3.27 a | 157.95 ± 6.40 ab | 3.669  | 0.063            |
|                   | <i>nirD</i> | 43.01 ± 2.52 a   | 36.07 ± 0.79 a   | 39.15 ± 1.69 a  | 42.28 ± 3.24 a   | 1.996  | 0.193            |
|                   | <i>nrfA</i> | 53.36 ± 1.74 a   | 52.68 ± 5.49 a   | 58.71 ± 2.45 a  | 60.85 ± 2.65 a   | 1.394  | 0.313            |
|                   | <i>nrfH</i> | 18.18 ± 1.17 ab  | 17.74 ± 1.18 b   | 19.57 ± 0.34 ab | 21.17 ± 0.94 a   | 2.546  | 0.129            |
| Assimilatory      | <i>narB</i> | 6.83 ± 0.60 a    | 5.22 ± 1.14 a    | 5.54 ± 0.72 a   | 7.03 ± 0.42 a    | 1.406  | 0.310            |
| nitrate reduction | <i>nasA</i> | 107.93 ± 2.54 b  | 106.64 ± 5.42 b  | 120.31 ± 2.61 a | 123.57 ± 1.23 a  | 6.664  | <b>0.014</b>     |
|                   | <i>nasB</i> | 8.26 ± 1.47 a    | 6.95 ± 0.92 a    | 8.79 ± 1.07 a   | 7.38 ± 1.45 a    | 0.444  | 0.728            |
|                   | <i>nirA</i> | 47.40 ± 1.49 a   | 49.01 ± 1.69 a   | 51.51 ± 1.35 a  | 47.08 ± 2.30 a   | 1.34   | 0.328            |
| Organic nitrogen  | <i>ureC</i> | 155.51 ± 3.54 a  | 149.04 ± 5.64 a  | 154.92 ± 1.69 a | 154.71 ± 3.52 a  | 0.613  | 0.625            |
| metabolism        | <i>gdh</i>  | 108.38 ± 4.88 a  | 100.99 ± 2.11 ab | 94.86 ± 0.99 b  | 92.54 ± 2.79 b   | 5.421  | <b>0.025</b>     |

Treatments were CK, control; NF, chemical N fertilization; OM, organic manure application; and NM,

combination of chemical N fertilizer and organic manure application. Values are means  $\pm$  standard errors

(n = 3). Different lowercase letters in a row indicate significant difference ( $p < 0.05$ ) among treatments.

**Table S5.** Relative abundances of microbial dominant phyla (relative abundance > 1%) involved in soil N cycling under different fertilization treatments.

| Phyla                          | CK                 | NF                | OM                | NM                | F     | <i>p</i>     |
|--------------------------------|--------------------|-------------------|-------------------|-------------------|-------|--------------|
| <i>Proteobacteria</i>          | 33.5 $\pm$ 1.15 ab | 33.0 $\pm$ 0.44 b | 36.0 $\pm$ 0.66 a | 35.6 $\pm$ 0.56 a | 3.84  | 0.057        |
| <i>Actinobacteria</i>          | 26.6 $\pm$ 0.33 a  | 26.8 $\pm$ 1.01 a | 26.2 $\pm$ 0.31 a | 26.1 $\pm$ 1.07 a | 0.19  | 0.901        |
| <i>Thaumarchaeota</i>          | 7.8 $\pm$ 0.42 a   | 6.9 $\pm$ 0.13 a  | 7.0 $\pm$ 0.24 a  | 6.8 $\pm$ 0.35 a  | 2.19  | 0.166        |
| <i>Acidobacteria</i>           | 5.2 $\pm$ 0.09 a   | 5.5 $\pm$ 0.01 a  | 5.3 $\pm$ 0.25 a  | 5.3 $\pm$ 0.22 a  | 0.71  | 0.573        |
| <i>Unclassified</i>            | 3.4 $\pm$ 0.04 a   | 3.5 $\pm$ 0.13 4  | 3.5 $\pm$ 0.25 a  | 3.7 $\pm$ 0.07 a  | 0.782 | 0.537        |
| <i>Others</i>                  | 3.4 $\pm$ 0.21 a   | 3.6 $\pm$ 0.23 a  | 3.4 $\pm$ 0.53 a  | 3.5 $\pm$ 0.20 a  | 0.14  | 0.933        |
| <i>Nitrospirae</i>             | 3.0 $\pm$ 0.15 a   | 3.2 $\pm$ 0.21 a  | 3.2 $\pm$ 0.15 a  | 3.4 $\pm$ 0.17 a  | 0.79  | 0.535        |
| <i>Verrucomicrobia</i>         | 3.0 $\pm$ 0.13 a   | 3.0 $\pm$ 0.46 a  | 3.1 $\pm$ 0.23 a  | 2.8 $\pm$ 0.11 a  | 0.30  | 0.828        |
| <i>Cyanobacteria</i>           | 2.9 $\pm$ 0.04 a   | 3.1 $\pm$ 0.05 a  | 2.4 $\pm$ 0.17 b  | 2.4 $\pm$ 0.06 b  | 14.50 | <b>0.001</b> |
| <i>Chloroflexi</i>             | 2.7 $\pm$ 0.20 a   | 2.8 $\pm$ 0.17 a  | 2.3 $\pm$ 0.12 a  | 2.6 $\pm$ 0.22 a  | 1.43  | 0.303        |
| <i>Firmicutes</i>              | 2.7 $\pm$ 0.19 a   | 2.5 $\pm$ 0.07 ab | 2.1 $\pm$ 0.07 c  | 2.2 $\pm$ 0.07 bc | 6.94  | <b>0.013</b> |
| <i>Crenarchaeota</i>           | 1.6 $\pm$ 0.11 a   | 1.7 $\pm$ 0.15 a  | 1.6 $\pm$ 0.29 a  | 1.7 $\pm$ 0.05 a  | 0.07  | 0.974        |
| <i>Bacteroidetes</i>           | 1.6 $\pm$ 0.03 a   | 1.8 $\pm$ 0.28 a  | 1.4 $\pm$ 0.02 a  | 1.3 $\pm$ 0.10 a  | 1.73  | 0.239        |
| <i>Planctomycetes</i>          | 1.4 $\pm$ 0.11 a   | 1.4 $\pm$ 0.18 a  | 1.5 $\pm$ 0.14 a  | 1.6 $\pm$ 0.13 a  | 0.28  | 0.841        |
| <i>Candidatus_Rokubacteria</i> | 1.0 $\pm$ 0.11 a   | 1.1 $\pm$ 0.07 a  | 1.0 $\pm$ 0.04 a  | 0.9 $\pm$ 0.08 a  | 0.37  | 0.777        |

Treatments were CK, control; NF, chemical N fertilization; OM, organic manure application; and NM,

combination of chemical N fertilizer and organic manure application. ‘Others’ refers to all phyla with relative abundance less than 1%. Values are means  $\pm$  standard errors ( $n = 3$ ). Different lowercase letters in a row indicate significant difference ( $p < 0.05$ ) among treatments.

**Table S6.** Correlation coefficients of Mantel tests between the functional gene composition responsible for soil N cycling and soil properties.

| Environmental<br>attributes | N-cycling |              | Nitrification |              | Denitrification |              | DNRA   |              | ANRA   |              | ONM    |              |
|-----------------------------|-----------|--------------|---------------|--------------|-----------------|--------------|--------|--------------|--------|--------------|--------|--------------|
|                             | r         | p            | r             | p            | r               | p            | r      | p            | r      | p            | r      | p            |
| pH                          | -0.081    | 0.764        | -0.075        | 0.711        | -0.036          | 0.573        | -0.048 | 0.627        | -0.015 | 0.474        | -0.113 | 0.872        |
| BD                          | 0.352     | <b>0.030</b> | 0.070         | 0.334        | -0.031          | 0.543        | 0.340  | <b>0.028</b> | 0.397  | <b>0.047</b> | 0.495  | <b>0.014</b> |
| SWC                         | 0.310     | <b>0.025</b> | -0.186        | 0.937        | 0.389           | <b>0.012</b> | 0.202  | 0.089        | 0.087  | 0.218        | 0.070  | 0.259        |
| C:N                         | -0.009    | 0.505        | 0.339         | <b>0.010</b> | 0.122           | 0.233        | -0.128 | 0.731        | -0.127 | 0.713        | -0.065 | 0.550        |
| SOC                         | 0.608     | <b>0.002</b> | 0.044         | 0.324        | 0.593           | <b>0.001</b> | 0.321  | <b>0.019</b> | 0.373  | <b>0.006</b> | 0.234  | <b>0.037</b> |
| POC                         | -0.210    | 0.937        | 0.021         | 0.413        | -0.233          | 0.960        | -0.133 | 0.820        | -0.043 | 0.544        | -0.069 | 0.582        |
| PCM                         | 0.588     | <b>0.003</b> | 0.183         | 0.083        | 0.518           | <b>0.002</b> | 0.331  | <b>0.021</b> | 0.368  | <b>0.008</b> | 0.270  | <b>0.018</b> |
| MBC                         | 0.449     | <b>0.009</b> | 0.010         | 0.406        | 0.418           | <b>0.011</b> | 0.239  | 0.057        | 0.394  | <b>0.007</b> | 0.113  | 0.167        |
| STN                         | 0.638     | <b>0.001</b> | -0.026        | 0.519        | 0.532           | <b>0.001</b> | 0.472  | <b>0.002</b> | 0.437  | <b>0.005</b> | 0.202  | <b>0.046</b> |



|                                 |       |              |        |       |        |              |        |              |       |       |       |       |
|---------------------------------|-------|--------------|--------|-------|--------|--------------|--------|--------------|-------|-------|-------|-------|
| PON                             | 0.118 | 0.225        | 0.201  | 0.081 | 0.122  | 0.217        | -0.146 | 0.825        | 0.267 | 0.072 | 0.132 | 0.217 |
| PNM                             | 0.376 | <b>0.014</b> | -0.066 | 0.648 | 0.543  | <b>0.002</b> | 0.063  | 0.334        | 0.101 | 0.243 | 0.114 | 0.251 |
| MBN                             | 0.610 | <b>0.002</b> | 0.128  | 0.189 | 0.678  | <b>0.002</b> | 0.274  | 0.052        | 0.141 | 0.197 | 0.285 | 0.055 |
| NH <sub>4</sub> <sup>+</sup> -N | 0.292 | <b>0.027</b> | -0.031 | 0.542 | 0.127  | 0.165        | 0.423  | <b>0.003</b> | 0.137 | 0.188 | 0.128 | 0.200 |
| NO <sub>3</sub> <sup>-</sup> -N | 0.154 | 0.168        | -0.060 | 0.639 | -0.133 | 0.820        | 0.426  | <b>0.006</b> | 0.120 | 0.201 | 0.172 | 0.189 |

---

Soil properties were pH; BD, bulk density; SWC, soil water content; C: N, the ratio of soil organic C to total N; SOC, soil organic C; POC, particulate organic C; PCM, potential C mineralization; MBC, microbial biomass C; STN, soil total N; PON, particulate organic N; PNM, potential N mineralization; MBN, microbial biomass N; NH<sub>4</sub><sup>+</sup>-N and NO<sub>3</sub><sup>-</sup>-N. Significant ( $p < 0.05$ ) correlations are shown in bold.

# Supplementary Figures

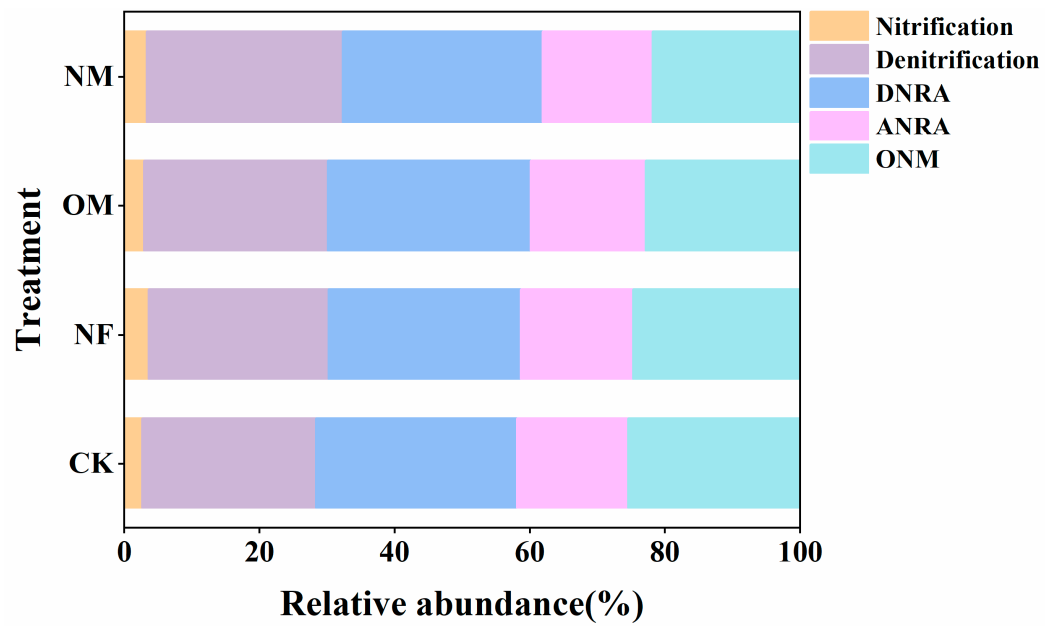

**Figure S1.** The relative abundances of genes involved in different N metabolism pathways under different fertilization treatments. Treatments were CK, control; NF, chemical N fertilization; OM, organic manure application; and NM, combination of chemical N fertilizer and organic manure application.

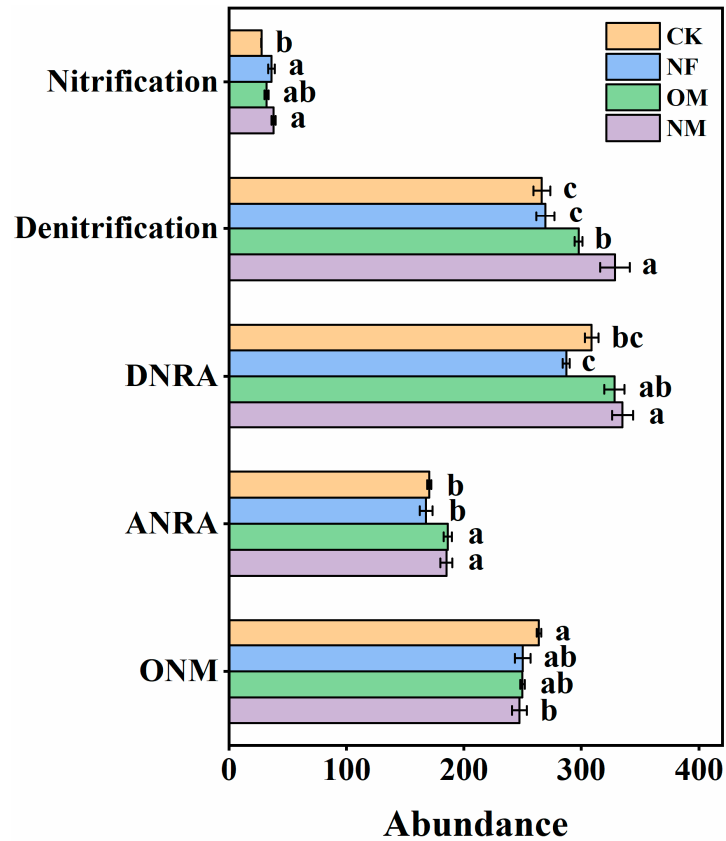

**Figure S2.** The abundances of genes involved in different N metabolism pathways under different fertilization treatments. Treatments were CK, control; NF, chemical N fertilization; OM, organic manure application; and NM, combination of chemical N fertilizer and organic manure application. Error bars represent standard error of the means (n =3). Different lowercase letters indicate significant difference ( $p < 0.05$ ) among treatments.

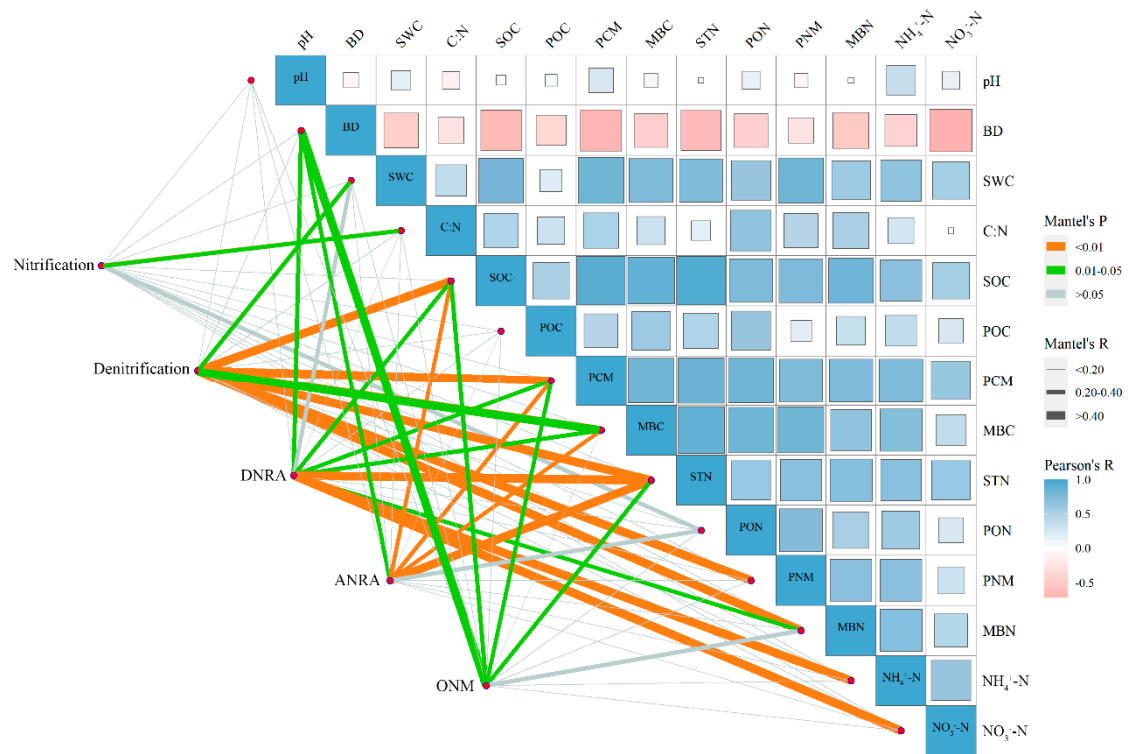

**Figure S3.** Relationships between the functional gene composition involved in different N metabolism pathways and soil properties.

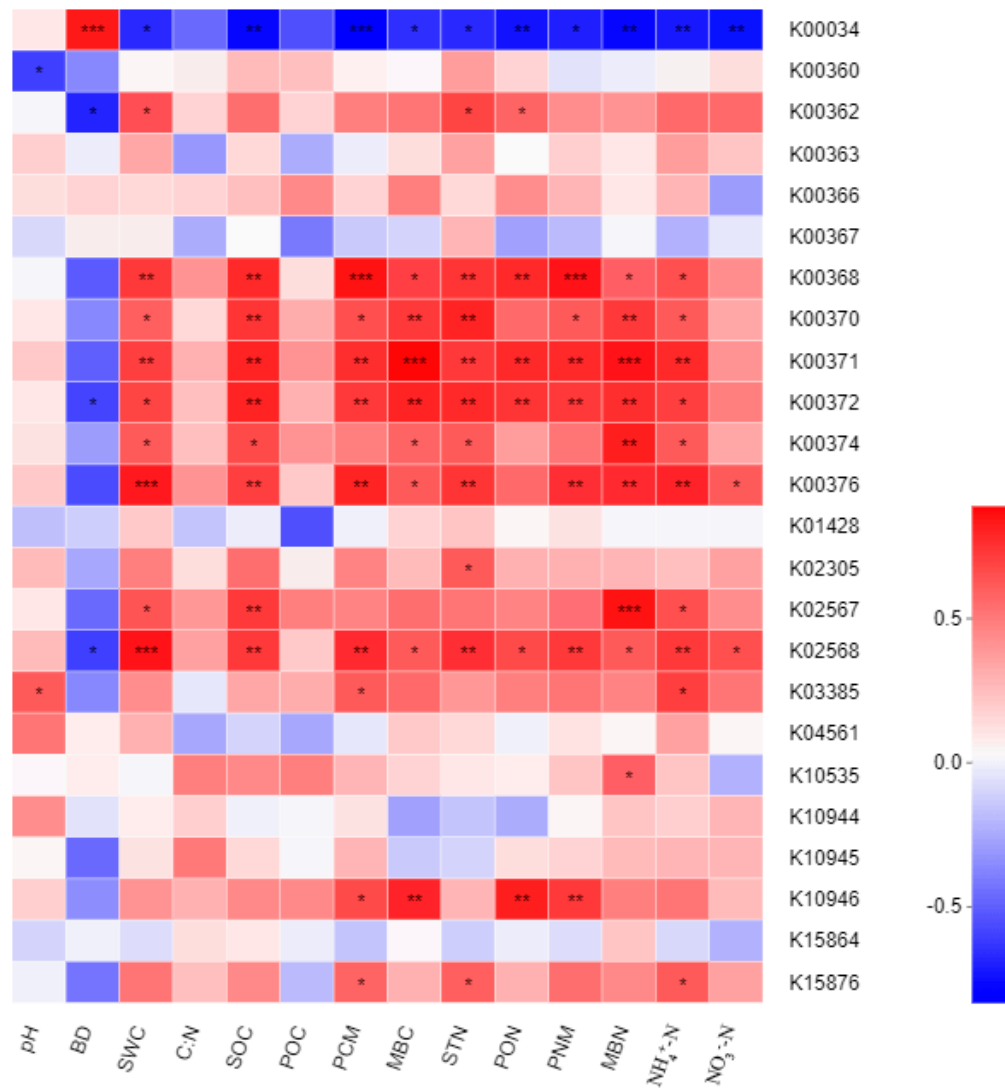

**Figure S4.** Spearman correlations between the abundances of N-cycling genes and soil properties. Red means positive relationship, blue means negative relationship. Significance is represented by \* -  $p < 0.05$ , \*\* -  $p < 0.01$ , \*\*\* -  $p < 0.001$ .
